# Supplementary material for: Microbial Nitrogen Metabolism in Chloraminated Drinking Water Reservoirs
Source: PubMed Central journal article supplement (PMC7193043; doi:10.1128/msphere.00274-20), 2020-04-29
Supplement: mSphere.00274-20-sf001.pdf [file mSphere.00274-20-sf001.pdf]

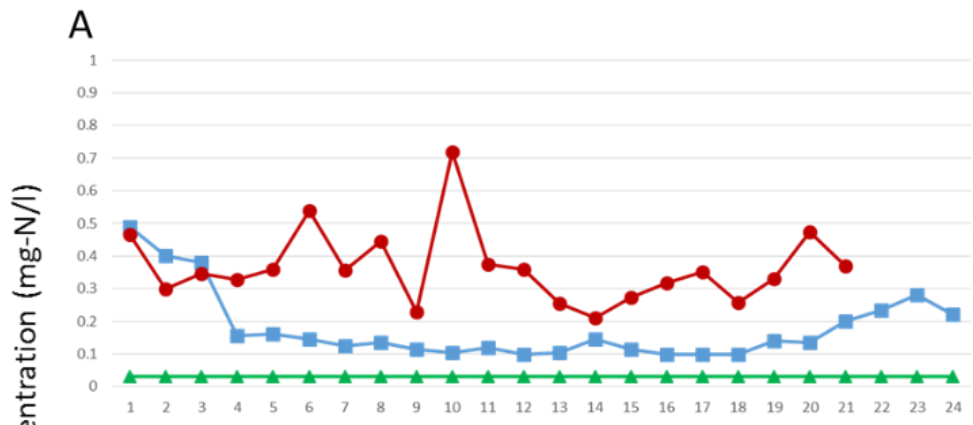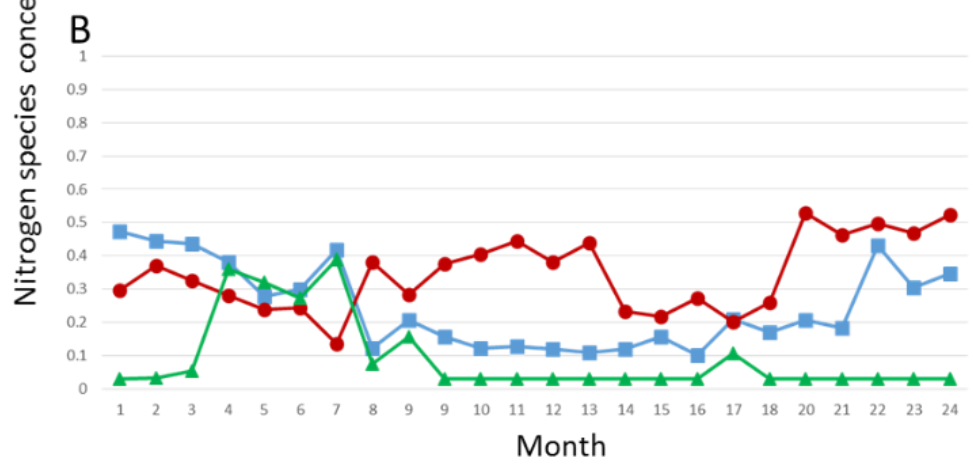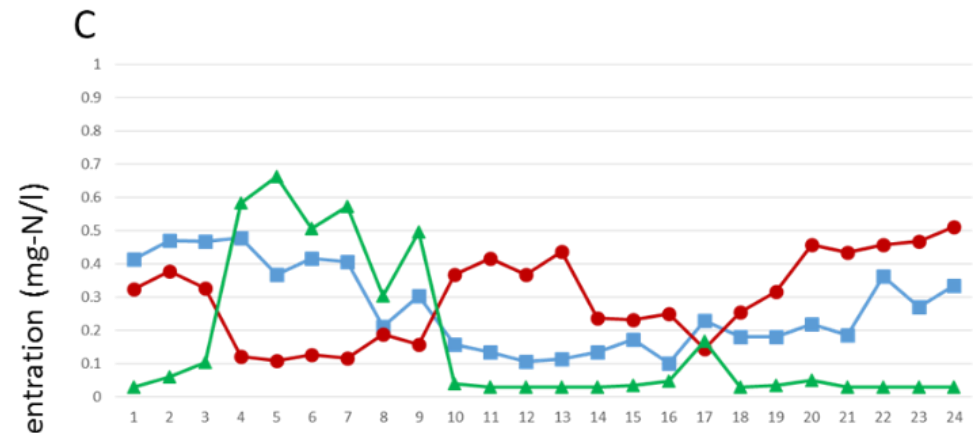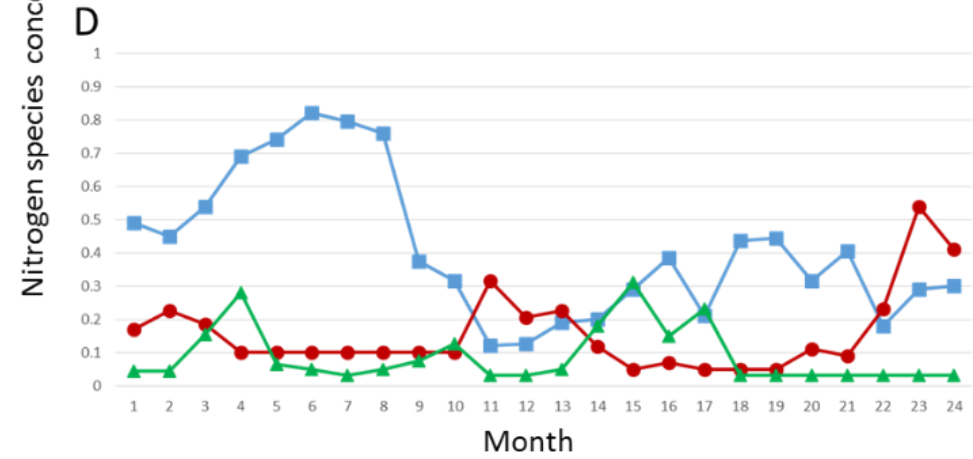

—●— Ammonium (NH<sub>4</sub><sup>+</sup>)    
 —▲— Nitrite (NO<sub>2</sub><sup>-</sup>)    
 —■— Nitrate (NO<sub>3</sub><sup>-</sup>)
