# Supplementary material for: Microbial Nitrogen Metabolism in Chloraminated Drinking Water Reservoirs
Source: PubMed Central journal article supplement (PMC7193043; doi:10.1128/msphere.00274-20), 2020-04-29

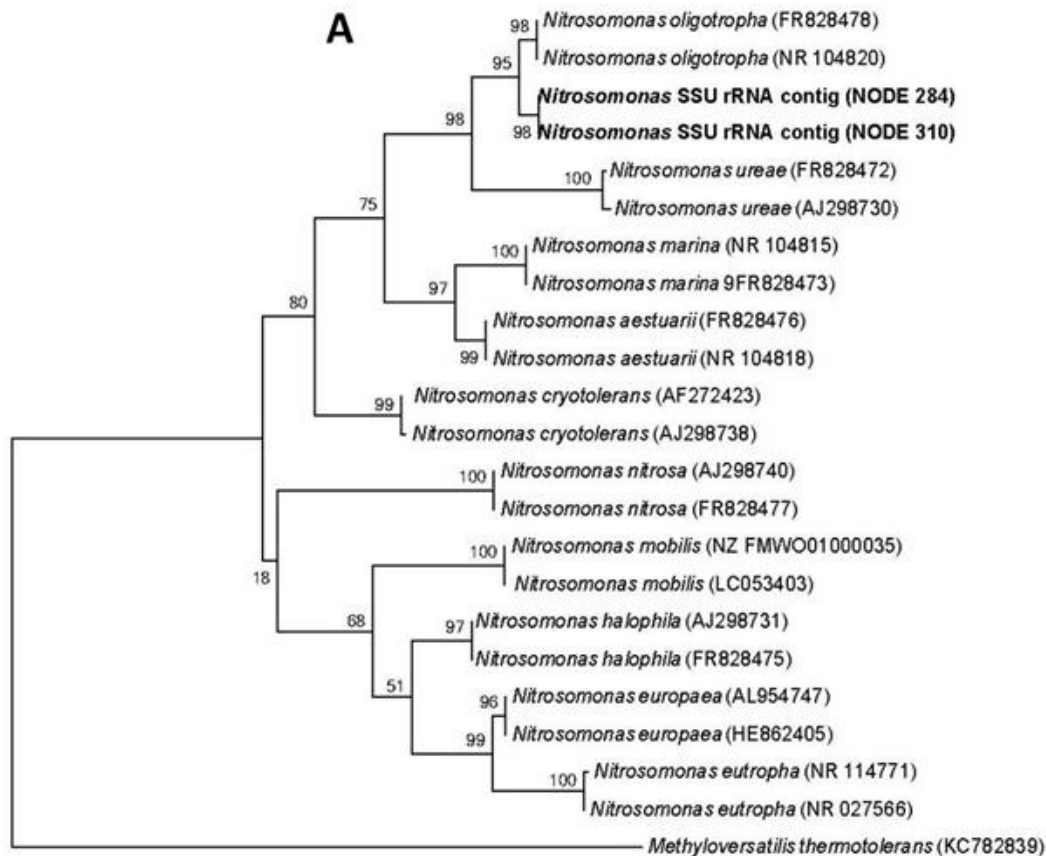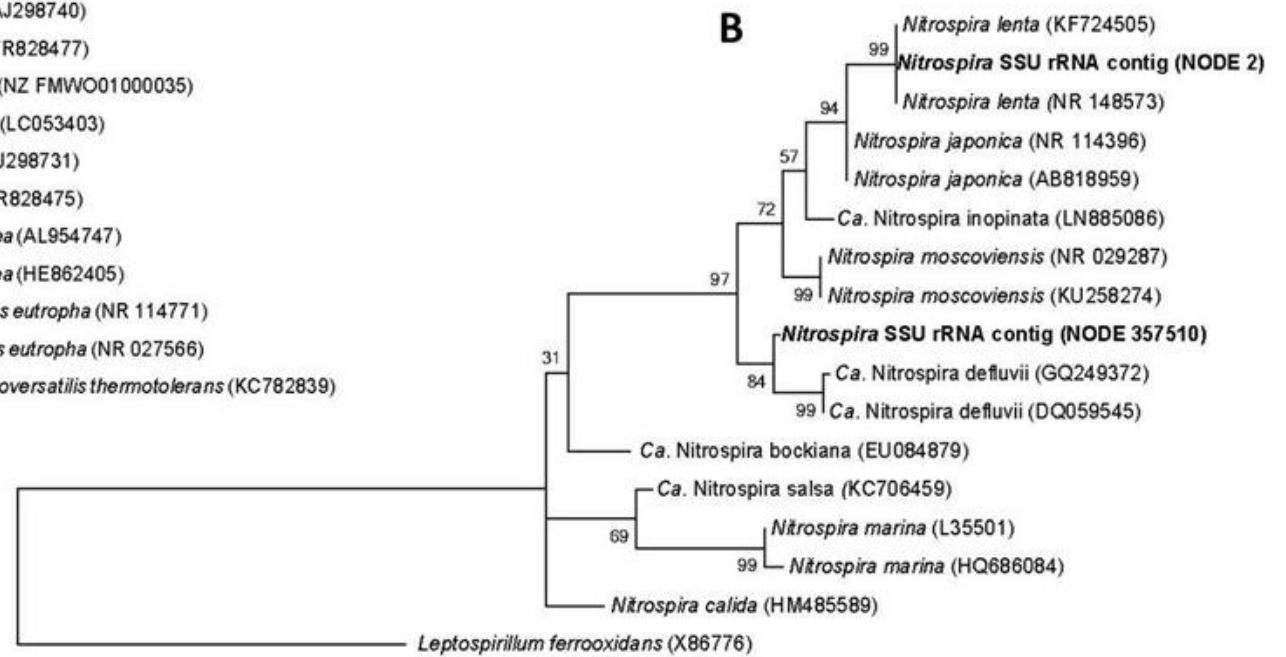

Supplement: mSphere.00274-20-sf002.pdf [file mSphere.00274-20-sf002.pdf]
